# Supplementary material
Source: publisher site journal article supplement (https://www.dovepress.com/article/359384)
Supplement: Supplementary file 1 [file get_supplementary_file.php]

Supplemental Figures


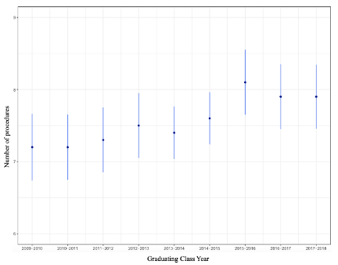


**Supplemental Figure 1.** Average number of Cornea/Corneoscleral Laceration/Globe Rupture procedures performed as primary surgeon per resident based on graduating class from 2009-2018 with 95% confidence interval


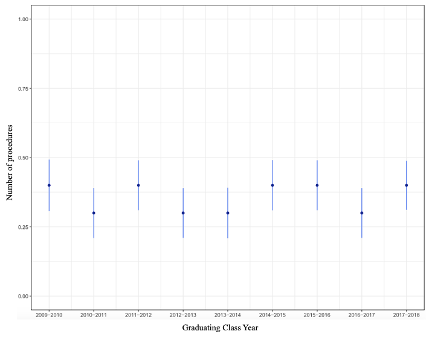


**Supplemental Figure 2.** Average number of intraocular foreign body procedures performed as primary surgeon per resident based on graduating class from 2009-2018 with 95% confidence interval.


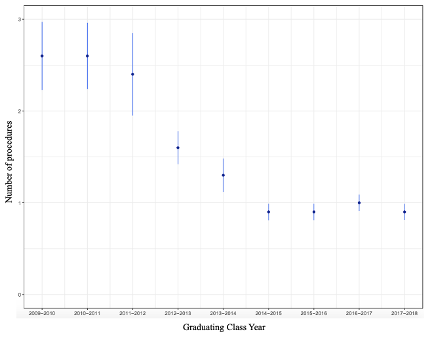


**Supplemental Figure 3.** Average number of “other” procedures performed as primary surgeon per resident based on graduating class from 2009-2018 with 95% confidence interval.


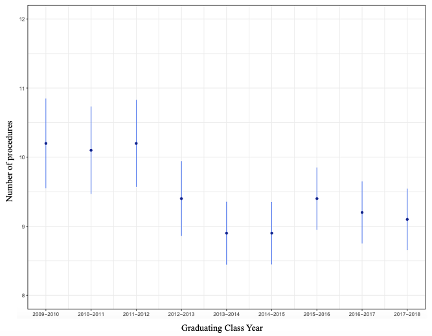


**Supplemental Figure 4.** Average number of total procedures performed as primary surgeon per resident based on graduating class from 2009-2018 with 95% confidence interval.
